# Supplementary material
Source: PubMed Central journal article supplement (PMC6240354)
Supplement: NIHMS994202-supplement-Supplemental_Methods_S1.pdf [file NIHMS994202-supplement-Supplemental_Methods_S1.pdf]

Supplemental Methods S1.

qRT-PCR Primers.

Runx2, 5'-GACACCACCAGGCCAATC-3' & 5'-AGAACAAGGGGGCCGTTA-3'

osterix, 5'-TGGAAAGCCAGTCTCATGGTGA-3' & 5'-TTGGGTATCTCCTTGCATGCCT-3';

alkaline phosphatase, 5'-TGATGAATGCTTGCGAAGGGT-3' & 5'-  
TCTCCGCATTGCATTTTCTGCT-3'

osteocalcin, 5'-CTCTGTCTCTCTGACCTCACAG-3' & 5'-  
GGAGCTGCTGTGACATCCATAC-3';

osteopontin, 5'-TGACCCATCTCAGAAGCAG-3' & 5'-GCTGACTTGACTCATGGCT-3'.

TaqMan probes.

Hes1 Hs00172878\_m1

Hes4 Hs00368353\_g1

Nanog Hs04399610\_g1

Sox2 Hs01053049\_s1

Oct4 Hs00999632\_g1

glyceraldehyde-3-phosphate dehydrogenase (GAPDH) Hs02758991\_g1
